# Supplementary material for: A simple solid media assay for detection of synergy between bacteriophages and antibiotics
Source: PubMed Central journal article supplement (PMC11064537; doi:10.1128/spectrum.03221-23), 2024-03-25
Supplement: spectrum.03221-23-s0001.pdf [file spectrum.03221-23-s0001.pdf]

A.

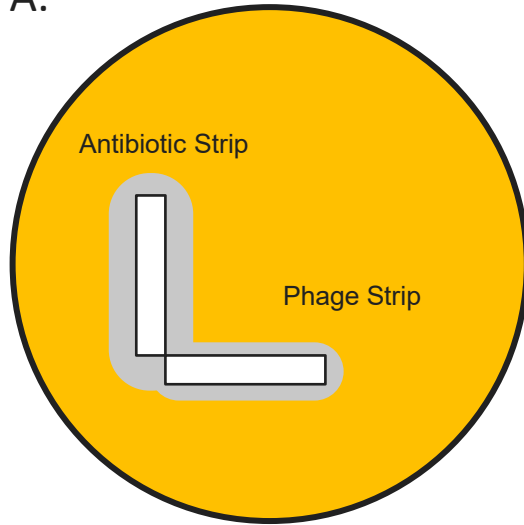

B.

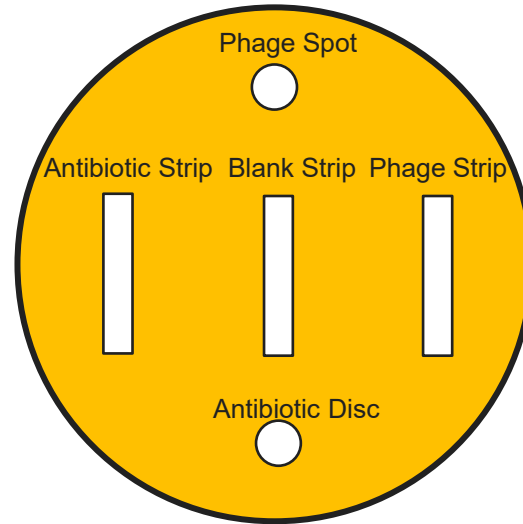

**Figure S1.** Plate configurations for screening of antibiotic-phage cooperativity. The test plate (Panel A) and control plate (Panel B) configurations are shown.
