# Supplementary material for: A simple solid media assay for detection of synergy between bacteriophages and antibiotics
Source: PubMed Central journal article supplement (PMC11064537; doi:10.1128/spectrum.03221-23), 2024-03-25
Supplement: spectrum.03221-23-s0002.pdf [file spectrum.03221-23-s0002.pdf]

A.

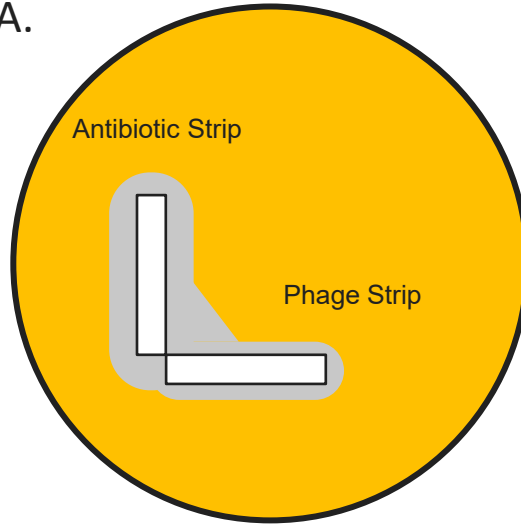

B.

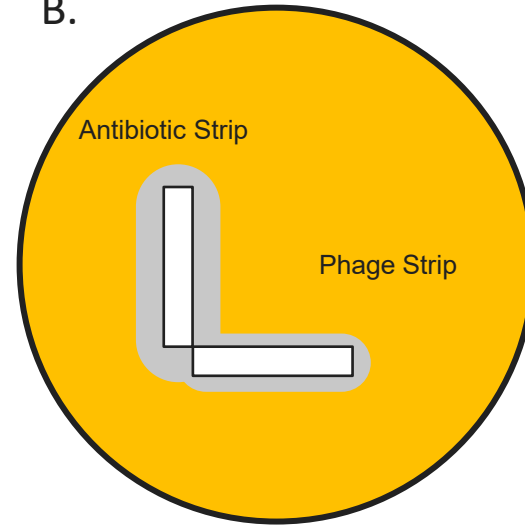

**Figure S2.** Possible patterns to be observed for phage-antibiotic cooperativity assays. Cooperativity (Panel A), and no cooperativity (Panel B) are shown.
