# Supplementary material for: A simple solid media assay for detection of synergy between bacteriophages and antibiotics
Source: PubMed Central journal article supplement (PMC11064537; doi:10.1128/spectrum.03221-23), 2024-03-25
Supplement: spectrum.03221-23-s0004.pdf [file spectrum.03221-23-s0004.pdf]

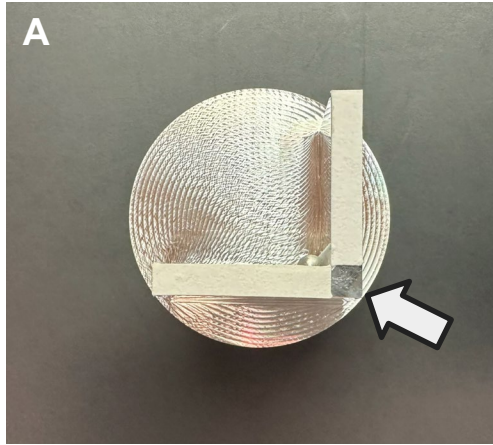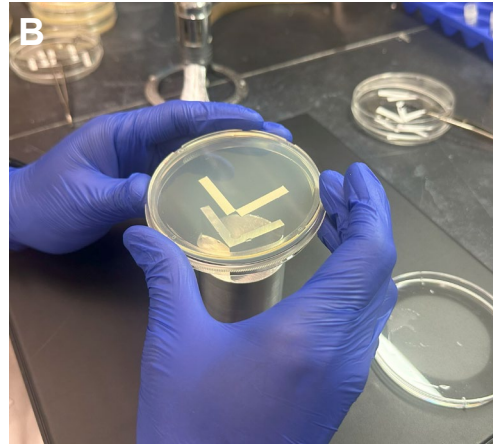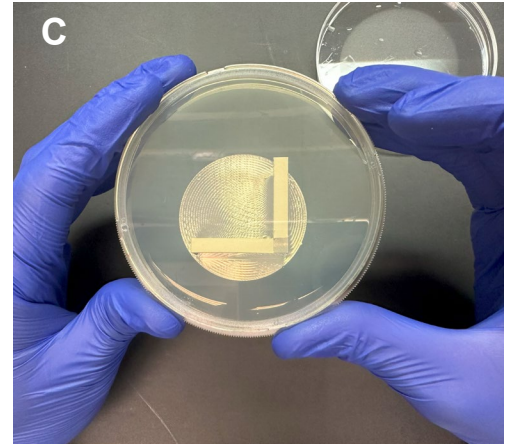

**Figure S4: Stamping Procedure.** A. Dried bacteriophage and antibiotic strips are aligned at 90° using the right-angle edge of the stamp column. The square region marked by arrow indicates that strips are not overlapping and aligned at 90°. B. The solidified plate is inverted and gently stamped onto the aligned strips. C. Top view of the stamping process. L-shape should be stamped so that there is plenty of room for bacteriophage and antibiotic strips to demonstrate proper clearing.
