# Supplementary material for: A simple solid media assay for detection of synergy between bacteriophages and antibiotics
Source: PubMed Central journal article supplement (PMC11064537; doi:10.1128/spectrum.03221-23), 2024-03-25
Supplement: spectrum.03221-23-s0007.pdf [file spectrum.03221-23-s0007.pdf]

**Table S1:** Concentration profiles

| <i>Concentration of Individual antimicrobial agents.<br/>Antibiotic (<math>\alpha</math>) and Bacteriophage (<math>\beta</math>)</i> |                |
|--------------------------------------------------------------------------------------------------------------------------------------|----------------|
| $C_{\alpha}(x, t) = C_0 + (C_{\alpha,source} - C_0) * (1 - \text{erf}(\eta_{\alpha}))$                                               | <i>Eq. 1A</i>  |
| $C_{\beta}(y, t) = C_0 + (C_{\beta,source} - C_0) * (1 - \text{erf}(\eta_{\beta}))$                                                  | <i>Eq. 1B</i>  |
| <i>Error function</i>                                                                                                                |                |
| $\text{erf}(\eta_{\alpha}) = 2/\sqrt{\pi} \int_0^{\eta_{\alpha}} e^{-x^2} dx$                                                        | <i>Eq. 2A</i>  |
| $\text{erf}(\eta_{\beta}) = 2/\sqrt{\pi} \int_0^{\eta_{\beta}} e^{-y^2} dy$                                                          | <i>Eq. 2B</i>  |
| <i>Non-dimensionalized distance</i>                                                                                                  |                |
| $\eta_{\alpha} = \frac{x}{2\sqrt{D_{\alpha} * t}}$                                                                                   | <i>Eq. 3A</i>  |
| $\eta_{\beta} = \frac{y}{2\sqrt{D_{\beta} * t}}$                                                                                     | <i>Eq. 3B</i>  |
| <i>Boundary Conditions (B.C.)</i>                                                                                                    |                |
| $C_{\alpha}(0, t) = C_{\alpha,source}$                                                                                               | <i>B.C. 1A</i> |
| $C_{\alpha}(\infty, t) = C_0$                                                                                                        | <i>B.C. 2A</i> |
| $C_{\beta}(0, t) = C_{\beta,source}$                                                                                                 | <i>B.C. 1B</i> |
| $C_{\beta}(\infty, t) = C_0$                                                                                                         | <i>B.C. 2B</i> |
| <i>Initial Conditions (I.C.)</i>                                                                                                     |                |
| $C_{\alpha}(x, t \leq 0) = C_0$                                                                                                      | <i>I.C. 1A</i> |
| $C_{\beta}(y, t \leq 0) = C_0$                                                                                                       | <i>I.C. 1B</i> |

**Table S2:** Modeling parameters

| Parameter                                                    | Variable                                      | Value                       | Units                  |
|--------------------------------------------------------------|-----------------------------------------------|-----------------------------|------------------------|
| <i>Individual concentration profiles</i>                     |                                               |                             |                        |
| $C_\alpha(x, t)$                                             | Antibiotic concentration profile              | Eq. 1A                      | $\mu\text{g/mL}$       |
| $C_\beta(x, t)$                                              | Bacteriophage concentration profile           | Eq. 1B                      | $\mu\text{g/mL}$       |
| $C_0$                                                        | Initial concentration                         | 0                           | $\mu\text{g/mL}$       |
| $C_{\alpha,source}$                                          | <u>Antibiotic strip concentration</u>         |                             |                        |
|                                                              | Vancomycin                                    | 1.5                         | $\mu\text{g/mL}$       |
|                                                              | Linezolid                                     | 1.5                         |                        |
| Ampicillin                                                   | 0.4                                           |                             |                        |
| $C_{\beta,source}$                                           | <u>Bacteriophage strip concentration</u>      |                             |                        |
|                                                              | Phage Ben                                     | $1.2 \times 10^{-2}$        | $\mu\text{g/mL}$       |
|                                                              | Phage Bop                                     | $3.9 \times 10^{-3}$        |                        |
|                                                              | Phage PL                                      | $3.8 \times 10^{-2}$        |                        |
| Phage Bob                                                    | $7.2 \times 10^{-3}$                          |                             |                        |
| $\eta_\alpha$                                                | Non-dimensionalized x-displacement            | Eq. 3A                      | -                      |
| $\eta_\beta$                                                 | Non-dimensionalized y-displacement            | Eq. 3B                      | -                      |
| $D_\alpha$                                                   | Antibiotic diffusivity coefficient in agar    | $1 \times 10^{-6}$          | $\text{cm}^2/\text{s}$ |
| $D_\beta$                                                    | Bacteriophage diffusivity coefficient in agar | $5 \times 10^{-8}$          | $\text{cm}^2/\text{s}$ |
| $x$                                                          | x-displacement                                | $0 \leq x \leq 3$           | cm                     |
| $y$                                                          | y-displacement                                | $0 \leq y \leq 3$           | cm                     |
| $t$                                                          | time                                          | $0 \leq y \leq 20\text{hr}$ | s                      |
| <i>Combinatory Antibiotic and Bacteriophage interactions</i> |                                               |                             |                        |
| $C_{NI}$                                                     | No Interaction effective concentration        | Eq. 4                       | $\mu\text{g/mL}$       |
| $C_{add}$                                                    | Additive effective concentration              | Eq. 5                       | $\mu\text{g/mL}$       |
| $C_{syn}$                                                    | Synergistic effective concentration           | Eq. 6                       | $\mu\text{g/mL}$       |
| $C_{ant}$                                                    | Antagonistic effective concentration          | Eq. 7                       | $\mu\text{g/mL}$       |
| $k$                                                          | Synergy coefficient                           | $k_{low} = 1 \times 10^3$   | -                      |

| Parameter | Variable                 | Value                                                      | Units |
|-----------|--------------------------|------------------------------------------------------------|-------|
|           |                          | $k_{med} = 1 \times 10^6$<br>$k_{high} = 1 \times 10^{12}$ |       |
| $q$       | Antagonistic coefficient | 1                                                          | -     |

**Table S3:** Antibiotic ( $\alpha$ ) and Bacteriophage ( $\beta$ ) interactions

|                                 |                                                         |              |
|---------------------------------|---------------------------------------------------------|--------------|
| <i>No interaction</i>           | $C_{NI} = \max(C_\alpha, C_\beta)$                      | <i>Eq. 4</i> |
| <i>Additive interaction</i>     | $C_{add} = C_\alpha + C_\beta$                          | <i>Eq. 5</i> |
| <i>Synergistic interaction</i>  | $C_{syn} = C_\alpha + C_\beta + k * C_\alpha * C_\beta$ | <i>Eq. 6</i> |
| <i>Antagonistic interaction</i> | $C_{ant} = q * \text{abs}(C_\alpha - C_\beta)$          | <i>Eq. 7</i> |

**Table S4:** Bacteriophage strip estimated mass concentrations

| <b>Bacteriophage</b> | <b>PFU concentration used in experiment (PFU/mL)</b> | <b>Approximate molecular weight of virus</b> | <b>Estimated mass concentration (<math>\mu\text{g/mL}</math>)</b> |
|----------------------|------------------------------------------------------|----------------------------------------------|-------------------------------------------------------------------|
| Phage Ben            | 3.9e8 PFU/mL                                         | 194 MDa                                      | $1.2 \times 10^{-2} \mu\text{g/mL}$                               |
| Phage Bop            | 1.3e8 PFU/mL                                         | 194 MDa                                      | $3.9 \times 10^{-3} \mu\text{g/mL}$                               |
| Phage PL             | 1.27e9 PFU/mL                                        | 194 MDa                                      | $3.8 \times 10^{-2} \mu\text{g/mL}$                               |
| Phage Bob            | 2.4e8 PFU/mL                                         | 194 MDa                                      | $7.2 \times 10^{-3} \mu\text{g/mL}$                               |
| Phage KB824          | 1.0e10 PFU/ml                                        | 194 MDa                                      | 3.22 $\mu\text{g/mL}$                                             |
| Phage 2 $\Phi$ 2     | 2.28e8 PFU/ml                                        | 194 MDa                                      | $7.4 \times 10^{-2} \mu\text{g/mL}$                               |
| Phage ANB28          | 2.25e9 PFU/ml                                        | 194 MDa                                      | $7.3 \times 10^{-1} \mu\text{g/ml}$                               |

**Table S5 – Enterococcus strains and antibiotic susceptibilities**

| <b>Isolate</b>      | <b>Antibiotic</b> | <b>MIC</b> | <b>Interpretation</b> |
|---------------------|-------------------|------------|-----------------------|
| EF98PII (faecium)   | Ampicillin        | >8         | R                     |
|                     | Daptomycin        | 4          | S                     |
|                     | Gentamicin        | ≤500       | S                     |
|                     | Linezolid         | 2          | S                     |
|                     | Penicillin G      | >8         | R                     |
|                     | Tetracycline      | >8         | R                     |
|                     | Vancomycin        | >16        | R                     |
| EF208PII (faecium)  | Ampicillin        | >8         | R                     |
|                     | Daptomycin        | 4          | S                     |
|                     | Gentamicin        | ≤500       | S                     |
|                     | Linezolid         | 4          | I                     |
|                     | Penicillin G      | >8         | R                     |
|                     | Tetracycline      | >8         | R                     |
|                     | Vancomycin        | >16        | R                     |
| NYU (faecium)       | Ampicillin        | >8         | R                     |
|                     | Daptomycin        | >4         | No interpretation     |
|                     | Gentamicin        | ≤500       | S                     |
|                     | Linezolid         | 2          | S                     |
|                     | Penicillin G      | >8         | R                     |
|                     | Tetracycline      | >8         | R                     |
|                     | Vancomycin        | >16        | R                     |
| B3286 (faecalis)    | Ampicillin        | 2          | S                     |
|                     | Daptomycin        | 2          | S                     |
|                     | Gentamicin        | >500       | R                     |
|                     | Linezolid         | ≤1         | S                     |
|                     | Penicillin G      | 8          | S                     |
|                     | Tetracycline      | ≤5         | S                     |
|                     | Vancomycin        | 1          | S                     |
| Yi-6 (faecalis)     | Ampicillin        | 0.5        | S                     |
|                     | Daptomycin        | ≤1         | S                     |
|                     | Gentamicin        | ≤500       | S                     |
|                     | Linezolid         | 2          | S                     |
|                     | Penicillin G      | 2          | S                     |
|                     | Tetracycline      | >8         | R                     |
|                     | Vancomycin        | 1          | S                     |
| EF116PII (faecalis) | Ampicillin        | 1          | S                     |
|                     | Daptomycin        | ≤1         | S                     |

|                     |              |       |   |
|---------------------|--------------|-------|---|
|                     | Gentamicin   | >500  | R |
|                     | Linezolid    | <=1   | S |
|                     | Penicillin G | 4     | S |
|                     | Tetracycline | >8    | R |
|                     | Vancomycin   | >16   | R |
|                     |              |       |   |
| EF140PII (faecalis) | Ampicillin   | 1     | S |
|                     | Daptomycin   | 2     | S |
|                     | Gentamicin   | >500  | R |
|                     | Linezolid    | 2     | S |
|                     | Penicillin G | 8     | S |
|                     | Tetracycline | >8    | R |
|                     | Vancomycin   | >16   | R |
|                     |              |       |   |
| V587 (faecalis)     | Ampicillin   | 1     | S |
|                     | Daptomycin   | 2     | S |
|                     | Gentamicin   | >500  | R |
|                     | Linezolid    | <=1   | S |
|                     | Penicillin G | 4     | S |
|                     | Tetracycline | <=0.5 | S |
|                     | Vancomycin   | >16   | R |

**Table S6 – Stenotrophomonas strains and antibiotic susceptibilities**

| <b>Isolate</b> | <b>Antibiotic</b>             | <b>MIC</b> | <b>Interpretation</b> |
|----------------|-------------------------------|------------|-----------------------|
| <b>B28S</b>    | Ceftazidime                   | 16         | I                     |
|                | Levofloxacin                  | >4         | R                     |
|                | Trimethoprim-Sulfamethoxazole | 1/19       | S                     |
| <b>K279a</b>   | Ceftazidime                   | 16         | I                     |
|                | Levofloxacin                  | >4         | R                     |
|                | Trimethoprim-Sulfamethoxazole | 1/19       | S                     |
| <b>B28B</b>    | Ceftazidime                   | 16         | I                     |
|                | Levofloxacin                  | >4         | R                     |
|                | Trimethoprim-Sulfamethoxazole | 1/19       | S                     |
| <b>SM12</b>    | Ceftazidime                   | 2          | S                     |
|                | Levofloxacin                  | 2          | S                     |
|                | Trimethoprim-Sulfamethoxazole | <0.5/9.5   | S                     |
| <b>SM15</b>    | Ceftazidime                   | 2          | S                     |
|                | Levofloxacin                  | <=1        | S                     |
|                | Trimethoprim-Sulfamethoxazole | <=0.5/9.5  | S                     |
| <b>SM17</b>    | Ceftazidime                   | 16         | I                     |
|                | Levofloxacin                  | >4         | R                     |
|                | Trimethoprim-Sulfamethoxazole | 2/38       | S                     |
| <b>SM20</b>    | Ceftazidime                   | 4          | S                     |
|                | Levofloxacin                  | <=1        | S                     |
|                | Trimethoprim-Sulfamethoxazole | <0.5/9.5   | S                     |
| <b>SM22</b>    | Ceftazidime                   | >16        | R                     |
|                | Levofloxacin                  | >4         | R                     |
|                | Trimethoprim-Sulfamethoxazole | >2/38      | R                     |
|                | Minocycline                   | 0.50       | S                     |
| <b>SM26</b>    | Ceftazidime                   | 1          | S                     |
|                | Levofloxacin                  | <=1        | S                     |
|                | Trimethoprim-Sulfamethoxazole | <=0.5/9.5  | S                     |
|                | Minocycline                   | 0.38       | S                     |
| <b>SM27</b>    | Ceftazidime                   | >16        | R                     |
|                | Levofloxacin                  | <=1        | S                     |
|                | Trimethoprim-Sulfamethoxazole | <=0.5/9.5  | S                     |



|             |                               |           |   |
|-------------|-------------------------------|-----------|---|
| <b>SM49</b> | Ceftazidime                   | 8         | S |
|             | Levofloxacin                  | >4        | R |
|             | Trimethoprim-Sulfamethoxazole | <=0.5/9.5 | S |
|             |                               |           |   |
| <b>SM58</b> | Ceftazidime                   | >16       | R |
|             | Levofloxacin                  | 4         | I |
|             | Trimethoprim-Sulfamethoxazole | <=2/38    | S |
|             |                               |           |   |
| <b>SM71</b> | Ceftazidime                   | >16       | R |
|             | Levofloxacin                  | <=1       | S |
|             | Trimethoprim-Sulfamethoxazole | 1/19      | S |

| <b>Antibiotics</b>      |              | <b>Disk Concentration (<math>\mu\text{g}</math>)</b> | <b>Soaking Concentration (mg/ml)</b> |
|-------------------------|--------------|------------------------------------------------------|--------------------------------------|
| <i>Enterococcus</i>     | Ampicillin   | 10                                                   | 0.47                                 |
|                         | Vancomycin   | 30                                                   | 1.40                                 |
|                         | Linezolid    | 30                                                   | 1.40                                 |
| <i>Stenotrophomonas</i> | Ceftazidime  | 30                                                   | 1.40                                 |
|                         | Levofloxacin | 5                                                    | 0.23                                 |

**Table S7:** Antibiotic concentrations of disks and strips used in this study. Disk concentrations represent the manufacturer specifications of the antibiotics loaded onto each disk. Strip concentrations indicate the antibiotic concentrations that were used to soak the filter paper strips. The concentrations used to soak each strip were determined by taking the area of the disks compared to the strips and calculating the appropriate concentration of each antibiotic to reproduce an equal concentration of antibiotics per volume between the disks and the strips.

| <i>Enterococcus Strains</i> |          |         | Bacteriophage Susceptibility |     |     |    |
|-----------------------------|----------|---------|------------------------------|-----|-----|----|
|                             |          |         | Ben                          | Bob | Bop | PL |
| <i>E. faecium</i>           | EF98PII  | VRE     | ++                           |     | ++  |    |
|                             | EF208PII |         | ++                           |     | ++  |    |
|                             | NYU      |         | ++                           |     | ++  |    |
| <i>E. faecalis</i>          | V587     | VRE     | ++                           |     | +   |    |
|                             | EF116PII |         |                              | ++  |     | ++ |
|                             | EF140PII |         | ++                           | +   |     | ++ |
|                             | Yi-6     | Non-VRE | ++                           | +   | ++  |    |
|                             | B3286    |         | ++                           | ++  | ++  | ++ |

|            |              |          |
|------------|--------------|----------|
| ++         | +            |          |
| Full lysis | Intermediate | No Lysis |

**Table S8:** Bacteriophage susceptibility were measured through visually assessing 4µL bacteriophage spot assays on bacterial lawn. Based on clearing of spots full lysis, intermediate lysis, or no lysis was determined.

| <i>Enterococcus</i> Strains |          |         | Ampicillin |         |         |        | Vancomycin |         |         |        | Linezolid |         |         |        |
|-----------------------------|----------|---------|------------|---------|---------|--------|------------|---------|---------|--------|-----------|---------|---------|--------|
|                             |          |         | Ben (M)    | Bop (M) | Bob (M) | PL (S) | Ben (M)    | Bop (M) | Bob (M) | PL (S) | Ben (M)   | Bop (M) | Bob (M) | PL (S) |
| <i>E. faecium</i>           | EF98PII  | VRE     |            |         |         |        |            |         |         |        |           |         |         |        |
|                             | EF208PII |         |            |         |         |        |            |         |         |        |           |         |         |        |
|                             | NYU      |         |            |         |         |        |            |         |         |        |           |         |         |        |
| <i>E. faecalis</i>          | V587     | VRE     |            |         |         |        |            |         |         |        |           |         |         |        |
|                             | EF116PII |         |            |         |         |        |            |         |         |        |           |         |         |        |
|                             | EF140PII |         |            |         |         |        |            |         |         |        |           |         |         |        |
|                             | B3286    | Non-VRE |            |         |         |        |            |         |         |        |           |         |         |        |
|                             | Yi-6     |         |            |         |         |        |            |         |         |        |           |         |         |        |


  
 (S) - Siphoviridae

**Table S9:** Cooperativity across *E. faecium* and *E. faecalis* VRE and non-VRE strains in combination with phages Ben, Bop, Bob, and PL in combination with ampicillin, vancomycin, and linezolid. (M) Myoviridae (S) Siphoviridae.

| <b><i>Stenotrophomonas</i><br/>Strains</b> |       | <b>Bacteriophage Susceptibility</b> |              |              |
|--------------------------------------------|-------|-------------------------------------|--------------|--------------|
|                                            |       | <b>KB824</b>                        | <b>2Φ2</b>   | <b>ANB28</b> |
| <b><i>Stenotrophomonas maltophilia</i></b> | B28B  | ++                                  | ++           | ++           |
|                                            | B28S  | ++                                  | ++           | ++           |
|                                            | K279a |                                     |              | ++           |
|                                            | SM12  | ++                                  | ++           | ++           |
|                                            | SM15  | ++                                  |              | ++           |
|                                            | SM17  |                                     |              |              |
|                                            | SM20  |                                     |              | ++           |
|                                            | SM22  | ++                                  |              |              |
|                                            | SM26  |                                     |              | ++           |
|                                            | SM27  | ++                                  |              | +            |
|                                            | SM49  | ++                                  |              |              |
|                                            | SM58  |                                     |              |              |
|                                            | SM71  |                                     |              |              |
|                                            |       | ++                                  | +            |              |
|                                            |       | Full lysis                          | Intermediate | No Lysis     |

**Table S10:** Bacteriophage susceptibility were measured through visually assessing 4μL bacteriophage spot assays on bacterial lawn. Based on clearing of spots full lysis, intermediate lysis, or no lysis was determined.

| <i>Stenotrophomonas</i>             |       | Ceftazidime      |                  |                  | Levofloxacin     |                  |                  |
|-------------------------------------|-------|------------------|------------------|------------------|------------------|------------------|------------------|
|                                     |       | KB824<br>(P)     | 2Φ2<br>(S)       | ANB28<br>(S)     | KB824<br>(P)     | 2Φ2<br>(S)       | ANB28<br>(S)     |
| <i>Stenotrophomonas maltophilia</i> | B28B  | Cooperativity    | No cooperativity | Cooperativity    | No cooperativity | No cooperativity | No cooperativity |
|                                     | B28S  | Cooperativity    | No cooperativity | Cooperativity    | No cooperativity | No cooperativity | No cooperativity |
|                                     | K279a | No cooperativity | No cooperativity | Cooperativity    | No cooperativity | No cooperativity | No cooperativity |
|                                     | SM12  | No cooperativity | No cooperativity | No cooperativity | No cooperativity | No cooperativity | No cooperativity |
|                                     | SM15  | No cooperativity | No cooperativity | No cooperativity | No cooperativity | No cooperativity | No cooperativity |
|                                     | SM17  | No cooperativity | No cooperativity | No cooperativity | No cooperativity | No cooperativity | No cooperativity |
|                                     | SM20  | No cooperativity | No cooperativity | No cooperativity | No cooperativity | No cooperativity | No cooperativity |
|                                     | SM22  | No cooperativity | No cooperativity | No cooperativity | No cooperativity | No cooperativity | No cooperativity |
|                                     | SM26  | No cooperativity | No cooperativity | Cooperativity    | No cooperativity | No cooperativity | No cooperativity |
|                                     | SM27  | No cooperativity | No cooperativity | No cooperativity | No cooperativity | No cooperativity | No cooperativity |
|                                     | SM49  | No cooperativity | No cooperativity | No cooperativity | No cooperativity | No cooperativity | No cooperativity |
|                                     | SM58  | No cooperativity | No cooperativity | No cooperativity | No cooperativity | No cooperativity | No cooperativity |
|                                     | SM71  | No cooperativity | No cooperativity | No cooperativity | No cooperativity | No cooperativity | No cooperativity |

 **Cooperativity**  
 **No cooperativity**

(P) - Podoviridae

(S) - Siphoviridae

**Table S11:** Cooperativity across *Stenotrophomonas* isolates in combination with phages KB824, 2Φ2, ANB28 and antibiotics ceftazidime and levofloxacin.
